# Supplementary material for: Semaglultide targets Spp1 + microglia/macrophage to attenuate neuroinflammation following perioperative stroke
Source: Research Square preprint supplement (doi:10.21203/rs.3.rs-6312428/v1), 2025-05-06
Supplement: Supplementary file 1 [file 11c1e2f6e3e81f65e6bc3111.docx]

**Supplementary**

**Supplementary Figure 1. nGene, nUMI and percent of mitochondrial of distinct cell samples identified in the mice brain**

**
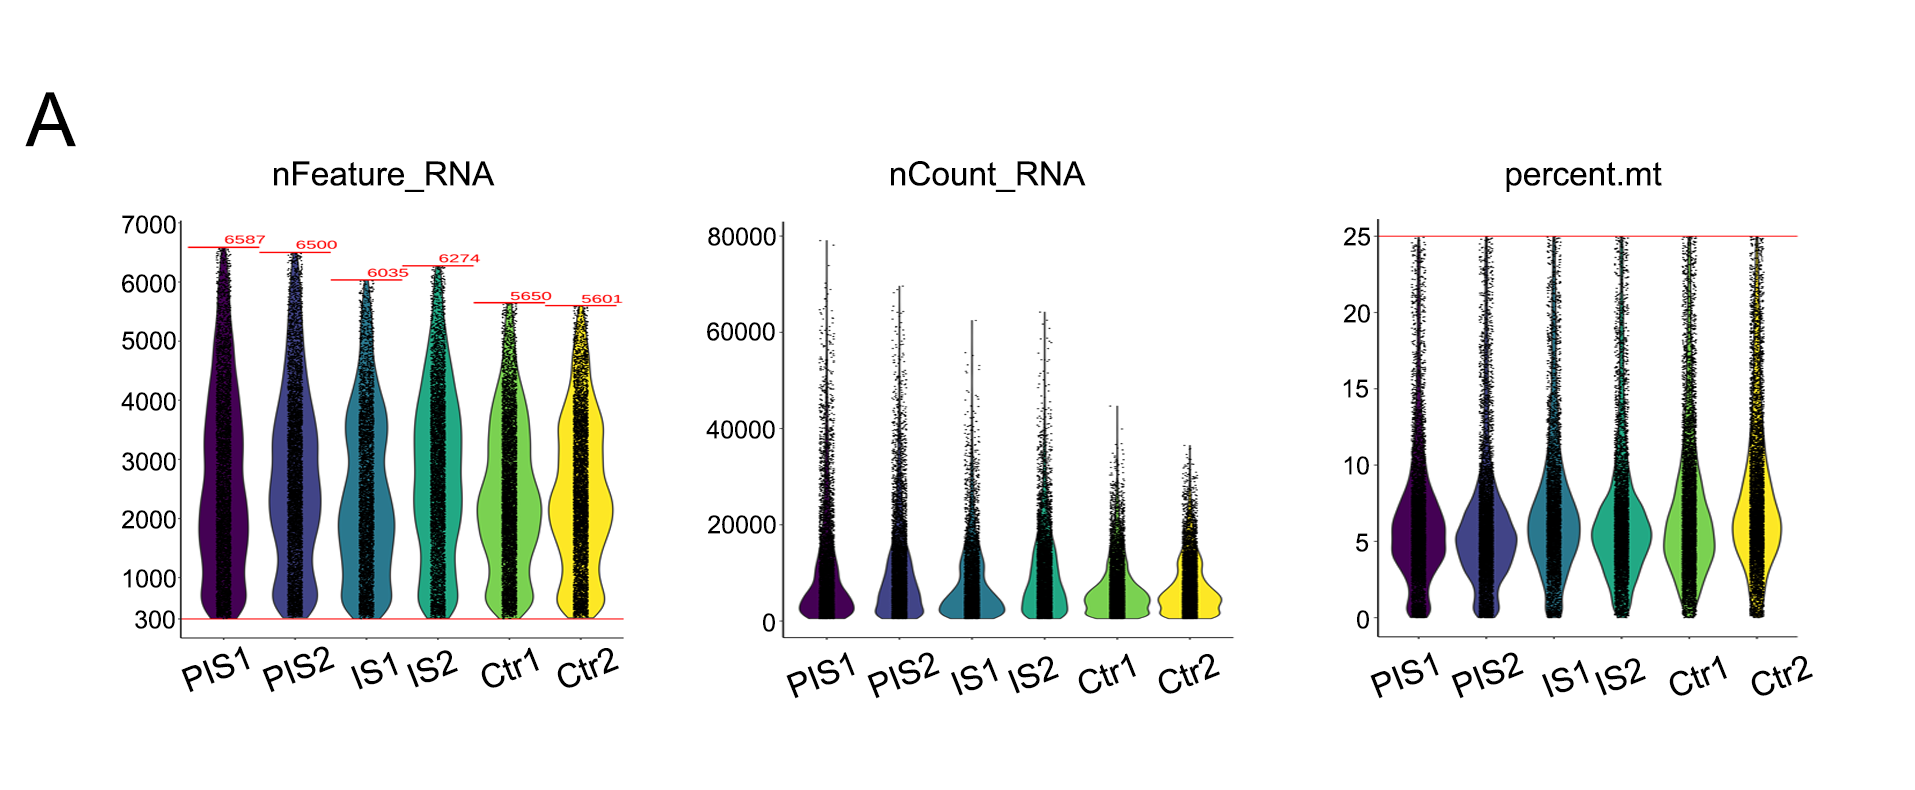
**

Supplementary Figure 1.

1. nGene, nUMI and percent of mitochondrial of 40986 individual brain cells from 2 Ctr (n=14696 cells), 2 IS (n=12251 cells) and 2 PIS (n=14039 cells) mice brain.

**Supplementary Figure 2. Gating strategy to identify cell types by flow cytometry and percentage of cell per mouse identified by flow cytometry.**


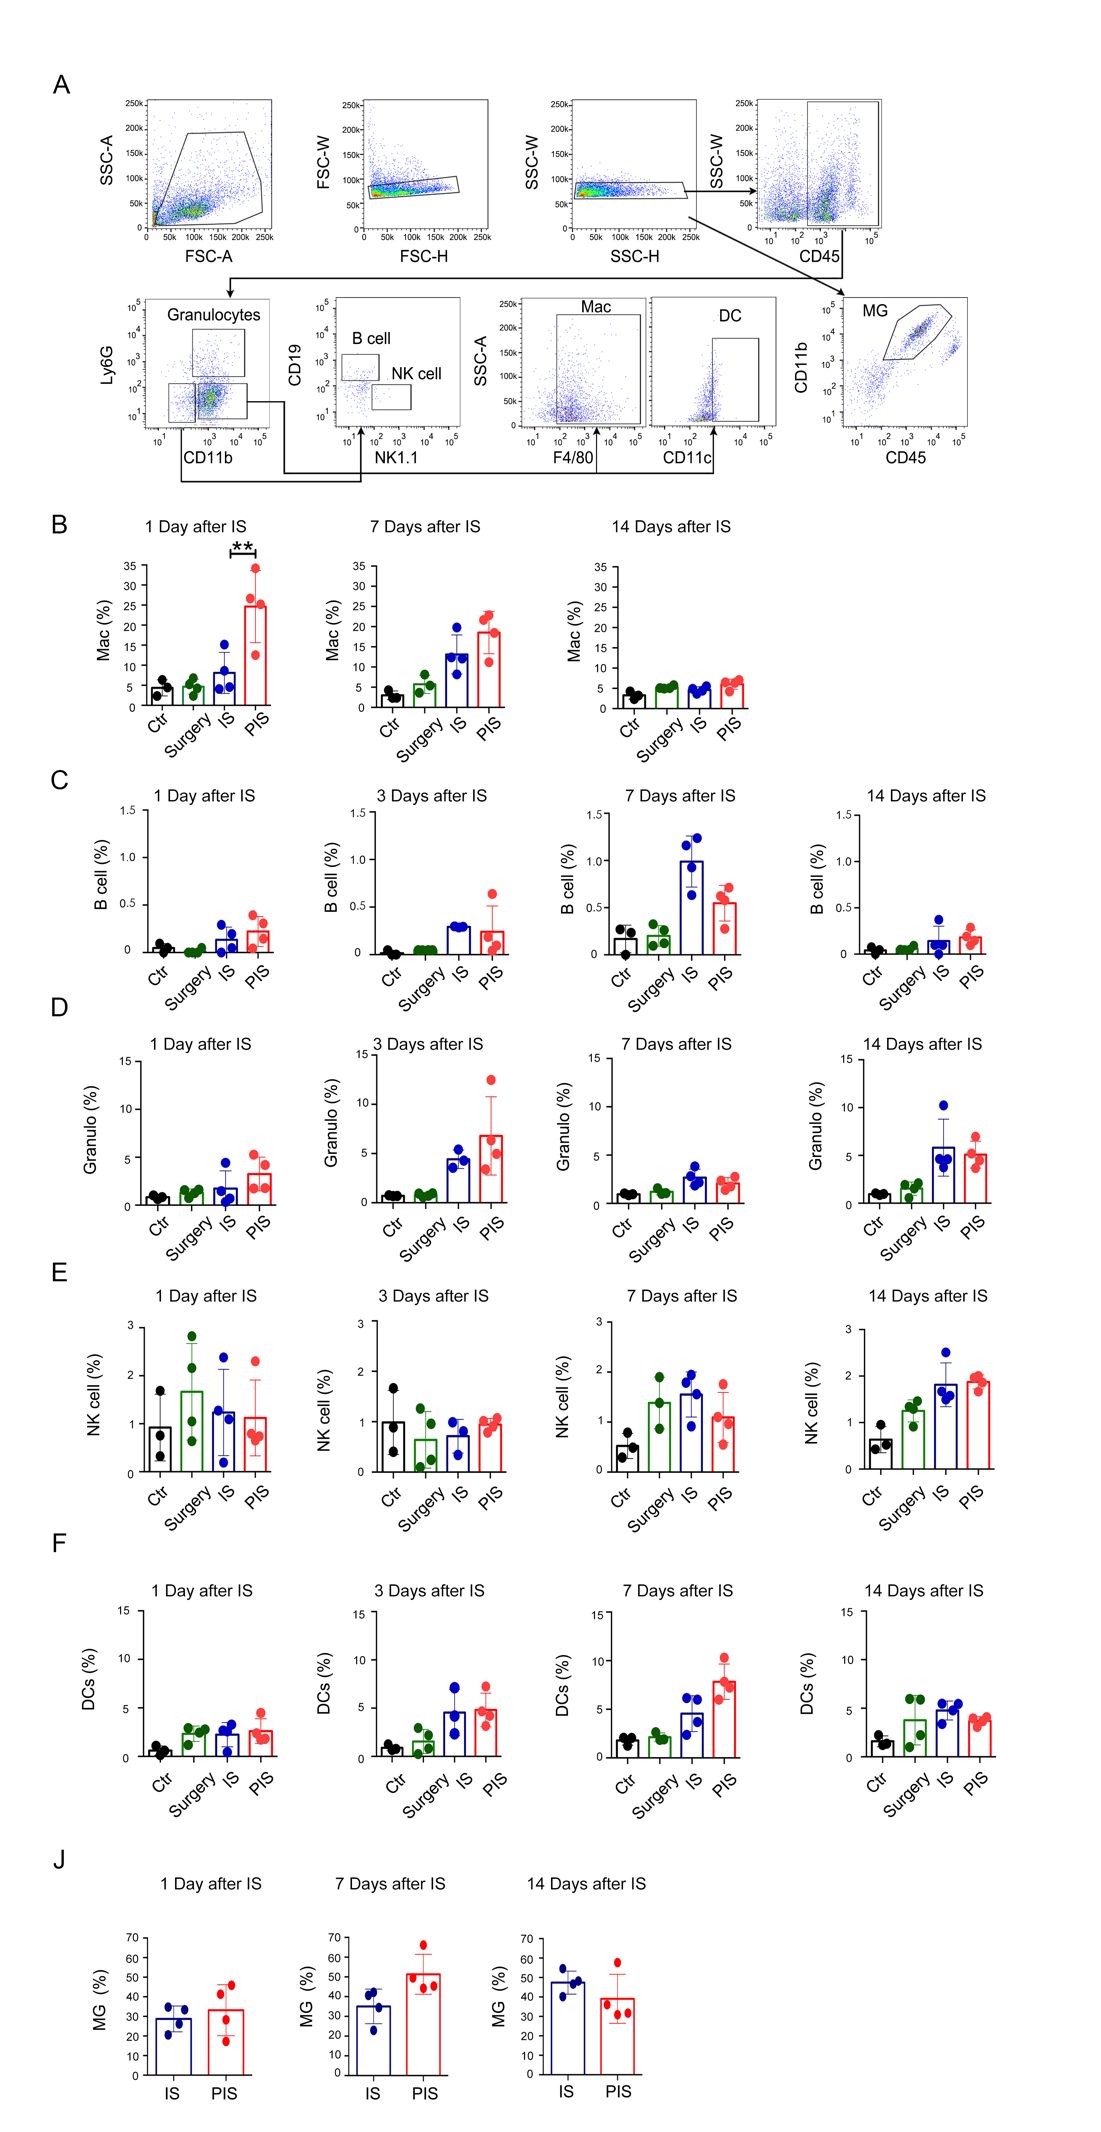


Supplementary Figure 2. Gating strategy to identify cell types by flow cytometry and percentage of cell per mouse identified by ow cytometry.

A. Representative gating strategy of the main cell types identified by flow cytometry in the brain of control (Ctr), surgery, IS and PIS mice 3 days after dMCAO.

B-J. Frequencies of Mac (Macrophages) (B), B (B cells) (C), Granulo (Granulocytes) (D), NK (Natural killer cells) (E), DC (dendritic cells) (F), and MG (Microglia) (J) of tissue-resident leukocytes Isolated out of the Brain from Ctr, surgery, IS and PIS mice 1, 3, 7, 14 days after dMCAO analyzed by Flow cytometry. (n = 4 per group, one-way ANOVA with Bonferroni multiple comparisons test or unpaired Student’s t test).

Data are represented as mean ± SD. ** p ≤ 0.01.

**Supplementary Figure 3. Surgery aggravates stroke outcome.**


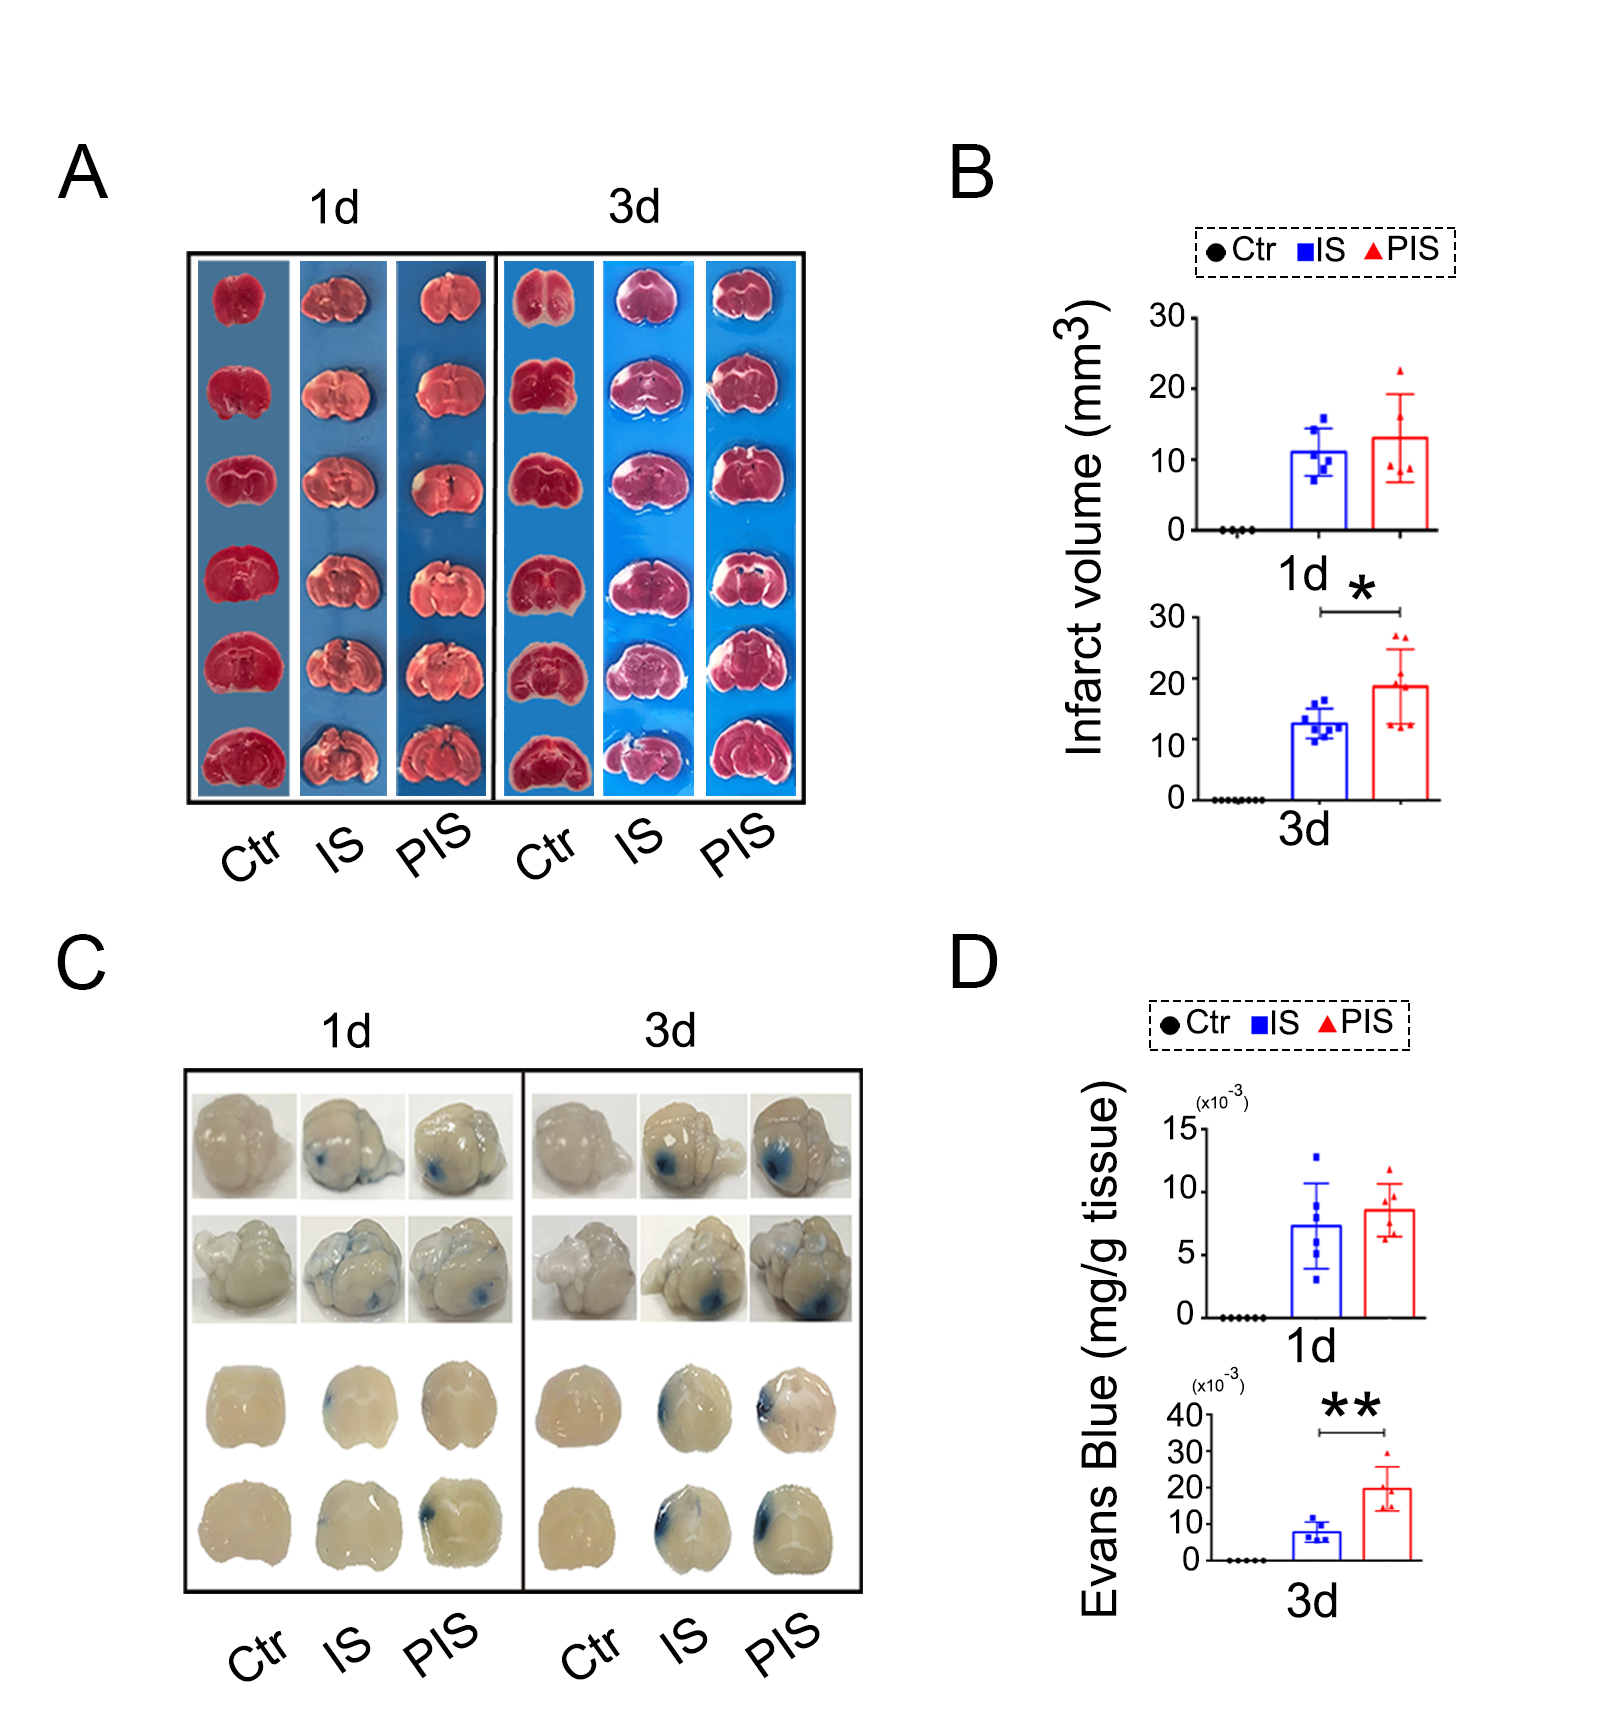


Supplementary Figure 3. Surgery aggravates stroke outcome.

1. Coronal TTC sections revealed cerebral infarct volumes in PIS mice and IS mice 3 days following dMCAO, (n=5 per group (1 day, BF+IS vs IS: P>0.99), n=8 per group (3 days), one-way ANOVA with Bonferroni multiple comparisons test).
2. Quantification of TTC staining of consecutive coronal sections (1 mm apart) from indicated group 3 d after dMCAO in A. (n = 4-8 per group, one-way ANOVA with Bonferroni multiple comparisons test).
3. Representative images of EB extravasation in the brain of Ctr, IS and PIS mice 1 and 3 days after dMCAO. (1 day (upper diagram), BF+IS vs IS: *P*>0.99; 3 days (lower diagram). (n = 5-6 per group, one-way ANOVA with Bonferroni multiple comparisons test).
4. Quantification of EB extravasation in the brain of Ctr, IS and PIS mice 1 and 3 days after dMCAO in C. (n = 4-8 per group, one-way ANOVA with Bonferroni multiple comparisons test).

Data are represented as mean ± SD. * p ≤ 0.05, ** p ≤ 0.01.

**Supplementary Figure 4. Surgery aggravates stroke neurological function.**


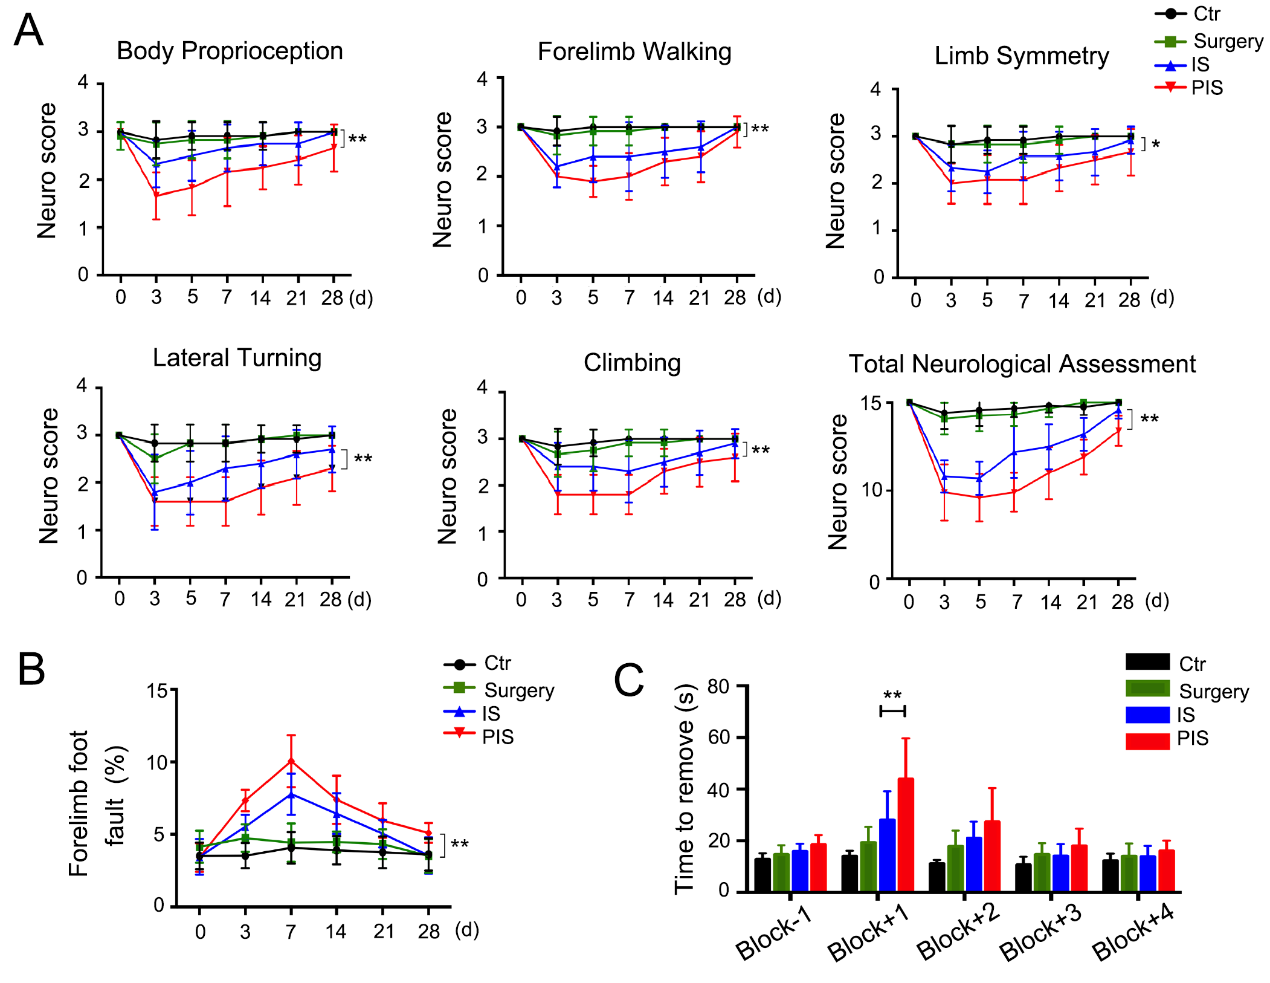


Supplementary Figure 4. Surgery aggravates stroke neurological function.

A-C. Sensorimotor dysfunction was significantly higher in PIS mice over the entire observation period as assessed by the Garcia score(A), grid walk (B), and adhesive removal test (C). (n=10‐12 per group, Two‐way repeated measures ANOVA resting was applied for differences between groups).

Data are represented as mean ± SD. *P ≤ 0.05, **P ≤ 0.01.

**Supplementary Figure 5. Characteristics of immune cells subcluster in brain**


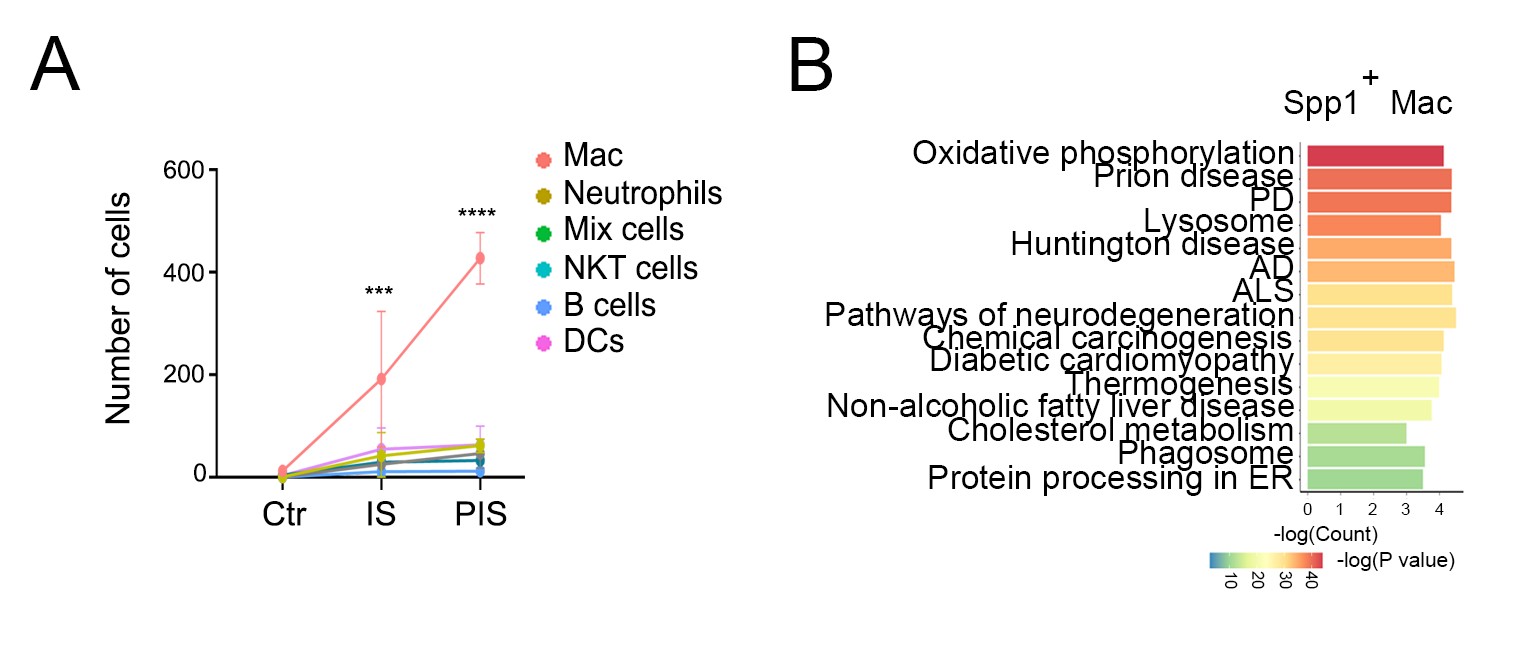


**Supplementary Figure 5. Characteristics of immune cells subcluster in brain**

1. The number of different leukocytes in (Supplementary Figure 3C) in different groups (Ctr, IS & PIS). (n=6, Two‐way repeated measures ANOVA resting was applied for differences between groups).
2. KEGG terms in Spp1+Mac subclusters.

Data are represented as mean ± SD. ***P ≤ 0.001, ****P ≤ 0.0001.

**Supplementary Figure 6. The expression of Spp1 in different immune cells in the brain.**

**
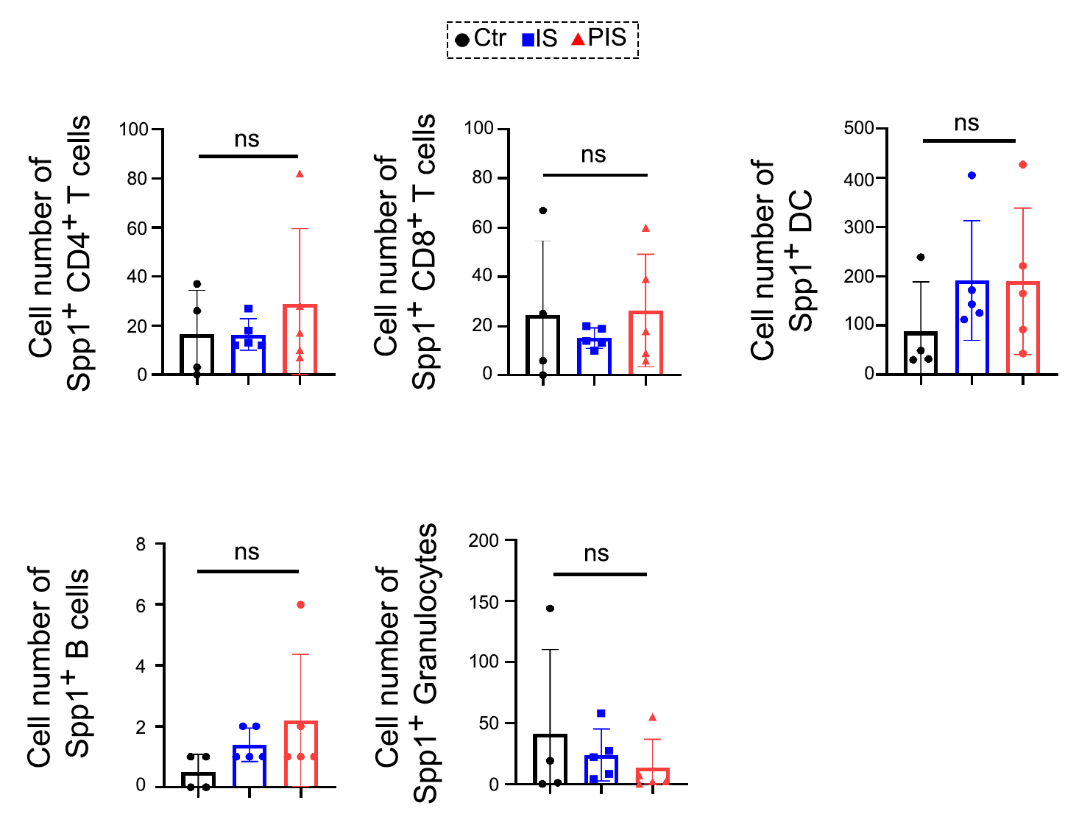
**

Supplementary Figure 6. The expression of Spp1 in different immune cells in the brain. (n=3‐5 per group, one-way ANOVA with Bonferroni multiple comparisons test).

Data are represented as mean ± SD. ns, no significant.

**Supplementary Figure 7. Dot plot of selected marker genes characterizing the clusters shown in Fig3.A**


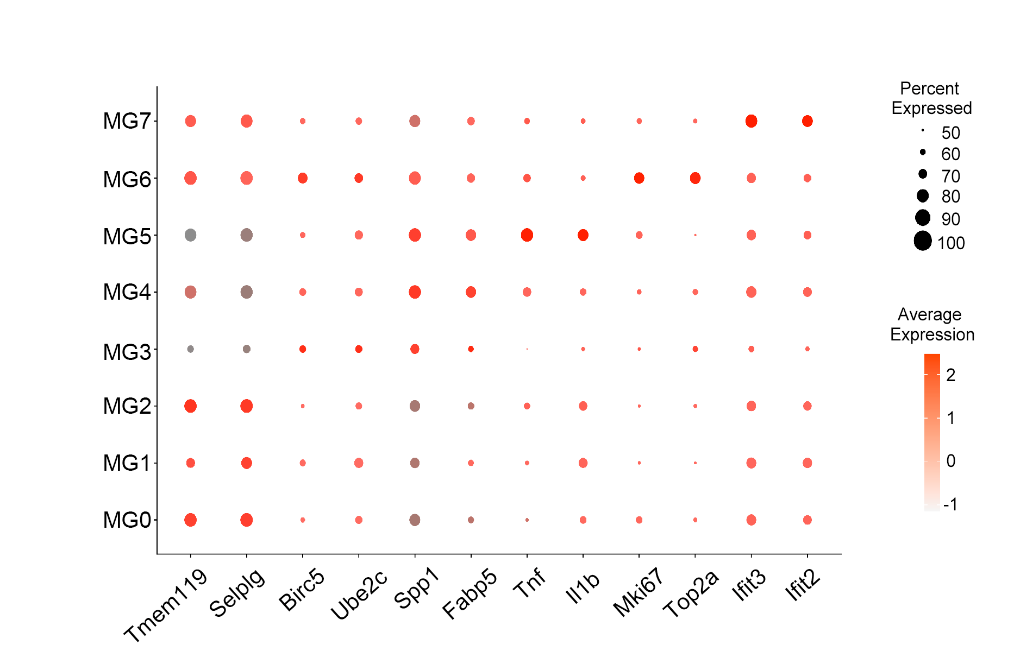


Supplementary Figure 7. Dot plot of selected marker genes characterizing the clusters shown in Fig3.A

**Supplementary Figure 8. Semaglutide attenuates the neuroinflammation in PIS mice**

**
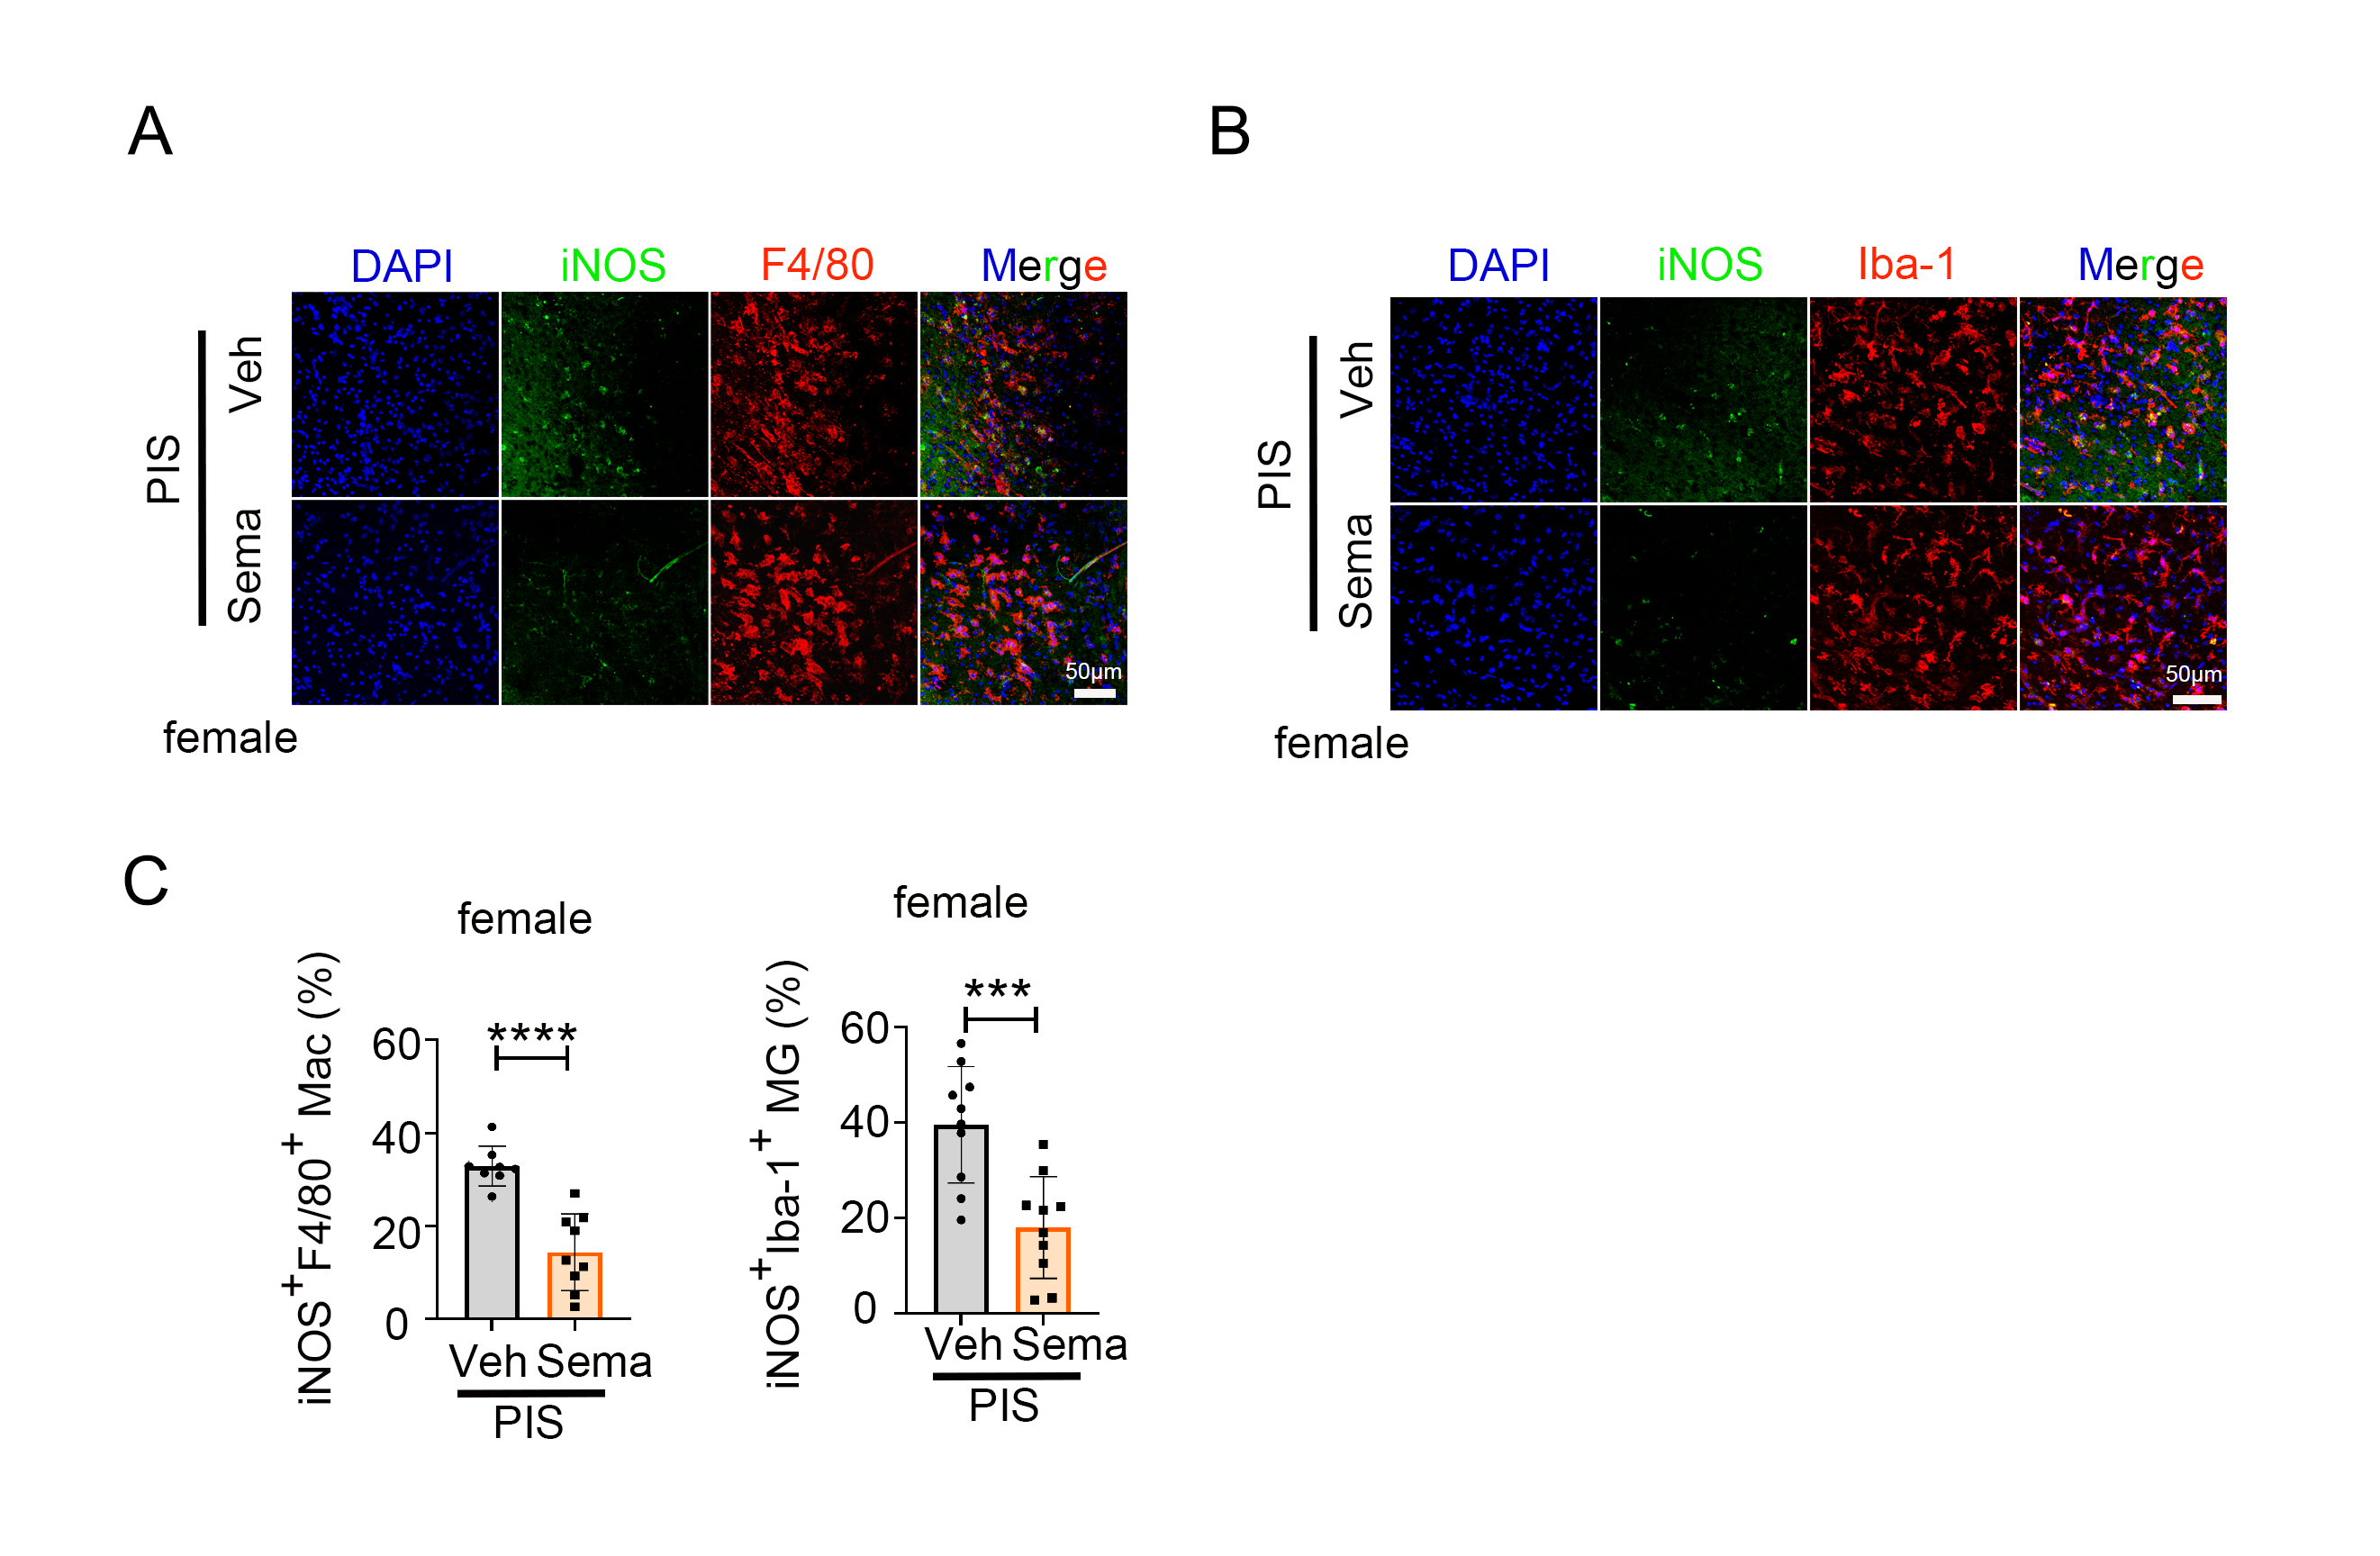
**

Supplementary Figure 8. Semaglutide attenuates the neuroinflammation in PIS mice

1. Representative confocal images of the iNOS and F4/80 in brain sections of indicated groups in female (down) mice. Scale bar, 50 µm.
2. Representative confocal images of the iNOS and Iba-1 in brain sections of indicated groups in female (down) mice. Scale bar, 50 µm.
3. Quantification of percentage of iNOS+ Mac (left) and iNOS+ MG (right) in brain sections of indicated groups in A. (n = 9 per group in male, n = 8-9 per group in female, unpaired Student’s t test).

Data are represented as mean ± SD. ***P ≤ 0.001, ****P ≤ 0.0001.
