# Supplementary material for: Semaglultide targets Spp1 + microglia/macrophage to attenuate neuroinflammation following perioperative stroke
Source: Research Square preprint supplement (doi:10.21203/rs.3.rs-6312428/v1), 2025-05-06
Supplement: Supplementary file 2 [file 9db367d3f1929d10fc9b3019.xlsx]

## Sheet: age associate-macrophage
Gene
Fabp5
Gpnmb
Lgals3
Cstb
Arg1
Plin2
Apoe
Hmox1
Ccl7
Pf4
Thbs1
Lgals1
Ccl2
Ms4a7
Ftl1
Ecm1
Ctsb
Fth1
Psap
Anxa5
Emp1
Spp1
Tgfbi
Rnh1
Prdx1
Pla2g7
Akr1a1
Fn1
C3ar1
Vim
Capg
Aprt
Cd68
Calr
Cd93
Prdx6
Nceh1
F10
Por
Dab2
Metrnl
Esd
App
Cndp2
Hspa5
Pkm
Fabp4
Mdfic
Pltp
Msr1

## Sheet: SAMC
Gene
Spp1
Fabp5
Gpnmb
Ctsb
Ctsl
Lgals3
Lpl
Fth1
Cd63
Ctsd
Apoe
Cd14
Plin2
Lgals1
Cd9
Pkm
Prdx1
Lilrb4a
Lilr4b
Ftl1
Mmp12
Psap
Cd68
Calr
Cstb
Gapdh
Syngr1
Cd72
Mafb
Csf1
Ccl9
C3ar1
Lrp1
Ccl4
Pld3
Arg1
Adam8
Capg
Aprt
Grn
Fn1
Creg1
Ecm1
Rrbp1
Ctsz
Tgfbi
Emp1
Thbs1
Dab2
Actb
Mpeg1
Anxa5
Vim
Esd
Tpt1
Gm42418
Msr1
Lipa
Zeb2
Lamp1
Gpr84
Rgs1
Cotl1
Rnh1
Npc2
Ccl3
Ucp2
Akr1a1
Mif
Rcan1
Abca1
Hmox1
Soat1
Msrb1
P4hb
App
Rps8
Ctsa
Rps29
Lyz2
Timp2
Ms4a6d
Pgam1
Cndp2
Gabarap
Ssr4
Plk2
Iqgap1
Emp3
Rps12
Il1rn
Psmb6
Fam20c
Pltp
Hsp90b1
Vat1
Tpp1
Rps2
Alas1
Por
Ppib
Ms4a7
Id2
Stab1
C5ar1
Rnf149
Tpi1
Rps21
Fcrls
Rpl12
Nceh1
Eef1a1
Bri3
Itga5
Basp1
Mt2
Nrp1
Tyrobp
Gm26917
Cpd
Vcp
Bola2
Rack1
Nme1
Lamtor1
Pgd
Clta
Gde1
Myo1e
Pdia6
Ifi27l2a
Atp6v1a
Sgk1
Tubb5
Atp5k
Ptms
Adssl1
Atp5g1
Txn1
Plek
Uap1l1
Rap2b
Rpl28
Cd93
Rab7b
Nrp2
Tgm2
Itga6
Erp29
Rpn1
Lgals3bp
Fnip2
Cd84
Uqcrq
Taldo1
Rap2a
Pla2g7
Blvrb
Cyba
M6pr
Atp5e
Sec61b
Slc11a1
Aldoa
Rpl6
Tmem86a
Slc43a2
Romo1
Sash1
Sgpl1
Lrpap1
Psmd1
Fcer1g
Manf
Gba
Nfic
Rnf128
Tpd52
AY036118
Tmem106a
2010107E04Rik
Atp5j2
Pgk1
Rps10
Psmb4
Cenpb
Atp5o.1
Tcirg1
Gclm
Ckap4
Cyfip1
Fyb
Edem1
Abcg1
Glrx
Tmed10
Pycard
Slc3a2
Gusb
Coro1c
Slc37a2
Hsp90ab1
Eif3c
Psen2
Ppp1r14b
Psmb5
Dhrs3
Sdc4
St13
1110008F13Rik
Man2a1
Usmg5
Slc27a1
Psmd8
Tln1
Bax
Npc1
Rpl23
Rps26
Gns
Surf4

## Sheet: inflam-macrophage
Gene
C1qb
C1qa
Nfkbiz
C1qc
Cxcl2
Cd83
Socs3
Egr1
Zfp36
Atf3
Csf1r
Nfkbia
Cd14
C3ar1
Ccrl2
Junb
C5ar1
Fcer1g
Ccl3
Ccl4
Ms4a7
Dab2
Tlr2
Marcksl1
Adgre1
Lgmn
Al607873
Cst3
Plek
Nlrp3

## Sheet: trem2 high macrophage
Gene
Trem2
C1qb
Anxa5
Hexb
Cd9
Ctsb
Cd63
Lgals3
Igf1
C1qc
Ctsz
Cd72
Ms4a7
Ctsd
Ctss
Prdx1
Dpep2
Cxcl16
Cd68
Tyrobp
Syngr1
C1qa
Fcer1g
Akr1a1
Hexa
Ctsa
Cst3
Gpx1
Spp1
Cyba

## Sheet: Jordao_microglia
Gene
Sparc
Hexb
Ctss
Csf1r
Ly86
C1qc
Apoe

## Sheet: BODIPYHi vs BODIPYLo)
Gene
ABHD5
ACAT1
ACLY
ACSL3
ADIPOR
ADRB1
ADRB2
ANXA1
APOE
ARF1
ARHGAP10
ARHGAP26
ARHGAP42
ATG3
ATGL
CCT
CH25H
CIDEC
CPT2
DDX5
DGAT1
DGAT2
DIAPH1
FASN
HMGCOAR
LAMP1
LAMP2
LDLR
LIPA
MALAT1
MARS2
MFN2
MTORC1
NDUFAF6
NDUFS4
NPC1
NPC2
OGA
ORP1L
ORP5
OSBP
PGC1
PLIN1
PLIN2
PLIN3
PLIN4
PLIN5
RAB11
RAB18
RAB24
RAB35
RAB6
RAB7
RAB8b
SAC1
SC5D
SCAP
SLC25A5
SLC38A9
SMP
SNAP23
SNAP29
SREBF2
SREBP
STARD3
TFEB
TREM2
VAP
VAST
VPS35

## Sheet: DAM1
Gene
Apoe
B2m
Cstb
Tyrobp
Timp2
H2-D1
Fth1
Lyz2
Ctsb
Ctsd
Gnas
LGALS3BP
Syngr1
CAPG

## Sheet: DAM2
Gene
FXYD5
Ank
Spp1
Axl
Csf1
Cst7
Cd9
Cadm1
Clec7a
Ccl6
Itgax
Cd63
Cd68
Ctsa
Lpl
Gusb
Serpine2
Ctsz
Cd52
Ctsl
Hif1a
Trem2
Grn

## Sheet: DAM
Gene
Itgax
Cst7
Fam20c
Ccl4
Csf1
5430435G22Rik
Ccl3
Clec7a
Baiap2l2
Lpl
Ank
Cox6a2
Spp1
Axl
Igf1
Psat1
Capg
Lyz2
Apoe
Lgi2
Nceh1
H2-D1
Cd83
Fxyd5
Apbb2
Dpp7
Ifi27l2b
Cd63-ps
Mif
Cadm1
Ccl6
Sulf2
Cd52
Cd63
Kcnj2
Myo1e
Scpep1
Ramp1
Aplp2
Rps24-ps3
Lgals3bp
Cd34
Slamf9
H2-K1
Crlf2
Ftl1
Gnas
AL928935.1
Bcl2a1b
Gm6030
Cd9
Ctsb
Cd74
Serpine2
Cxcl16
Gm16247
Gusb
Echs1
Pld3
Gm7331
Gm7363
Gm5239
Rpl36a-ps1
Ctsz
Syngr1
Scd2
Npc2
Gm5805
Gm10136
Gm9493
Gm15772
Sdc3
Gm10186
Tyrobp
Mir682
Naglu
Gm13192
Mt1
Rpl23
Gm10443
Ssr4
Gm13826
Atp6v0c
Gm10279
Gm5963
Fth1
Gm5244
Hif1a

## Sheet: IRM
Gene
Apoe
Ifi27l2a
Ifitm3
Ccl12
Ccl4
Lgals3bp
Cst7
Cd52
Bst2
H2-D1
Lpl
Ccl3
Ifit3
Isg15
Ifi204
H2-K1
Irf7
Cxcl10
Oasl2
Rtp4
Ccl5
B2m
Lyz2
Rps28
Rps29
Rpl41
Ctsb
Spp1
Ch25h
Gm10076
Slfn2
H2-Q7
Zfos1
Tspo
Stat1
Cd72
Rpl32
Rpl10a
Rpl37a
Usp18
Ccl2
Rpl38
Axl
Cd63
Tor3a
Rps19
Rpl36
Phf11b
Rpl35
Rpl39
Rpl23
Mif
Rps16
Oas1a
Uba52
Ifit2
Zbp1
Rps26
Rsad2
Cd83
Gm4951
Rpl37
Trim30a
Rps18
Sp100
Rps20
Ly6e
Rps24
Fau
Fcgr4
Rps12
Ly6a
Parp14
Rpl19
Rps15a
Rps27a
Ifit1
Rpl24
Grn
Rpsa
Rps27rt
Npc2
Gm9843
Rps27
Xaf1
Rpl12
Rpl26
Rps2
Wdr89
Rpl28
Rps21
Ccl6
Rpl35a
Rplp2
Rpl22l1
Gm2000
Rps11
Rpl36a
Cxcl13
Apoc1
H2-Q4
Sdc3
Fth1
Rpl29
Ftl1
Ctsl
Rps5
Rpl31
Rps25
Stat2
Rps8
Rps15
Rpl27a
Rps10
Rpl34
Gnas
AI607873
Rps14
Mnda
Rplp0
Cxcl16
Ctsz
Rps13
Rpl18a
Rps23
Rpl9
Mx1
Rpl21
Pyhin1
Rpl17
Rpl22
Rps7
Psme1
Tpt1
Rpl15
Phf11d
Gm4955
Rpl27
Rps6
Rpl7a
Fgl2
Ms4a4c
Rps17
Rpl13a
Gapdh
Rpl6
Gnb2l1
Sepw1
Ifit3b
Rpl30
Rpl13
Rpl23a
Rpl18
Tap1

[truncated: 4 more sheets: ATM, keren-shaul microglia-DAM, MgnD signatur(krasemann 2017), Age-associated microglia]
